# Supplementary material for: The Role of Multimodal Imaging in Pathological Response Prediction of Locally Advanced Cervical Cancer Patients Treated by Chemoradiation Therapy Followed by Radical Surgery
Source: MDPI journal article supplement (doi:10.3390/cancers15123071), 2023-06-06
Supplement: s1 [file s1]

**Supplementary table S1.** Ultrasound, MRI and PET/CT parameters that significantly differed between patients with partial response and those with complete response at "Baseline", "early", "final" examinations, and at the analysis of the changes between the quantitative variables of two longitudinal examinations in terms of percentage variation ( $\Delta$  "baseline"- "early" examinations and  $\Delta$  "baseline"- "final" examinations)

| Characteristic                                                                                                         | Partial response<br>n=48 | Complete response<br>n=40 | p value            |
|------------------------------------------------------------------------------------------------------------------------|--------------------------|---------------------------|--------------------|
| <b>"Baseline" examination</b>                                                                                          |                          |                           |                    |
| <i>US</i>                                                                                                              |                          |                           |                    |
| Color score 4, n (%)                                                                                                   | 33 (68.8)                | 19 (47.5)                 | <b>0.013</b>       |
| VI                                                                                                                     | 39.5 (13.0-69.0)         | 46.5 (14.0-86.0)          | <b>0.037</b>       |
| VFI                                                                                                                    | 15.0 (4.0-31.0)          | 18 (5.0-49.0)             | <b>0.036</b>       |
| Tumor peak enhancement, a.u. (n=86)                                                                                    | 18150.9 (1100.0-84580.5) | 28024.7 (1041.7-70106.0)  | <b>0.0006</b>      |
| Rise time, s (n=86)                                                                                                    | 8.7 (4.7-19.2)           | 7.6 (4.4-22.7)            | <b>0.038</b>       |
| Wash in rate (n=86)                                                                                                    | 2958.5 (240.5-160506.3)  | 5329.1 (85.6-23037.6)     | <b>0.003</b>       |
| <i>MRI</i>                                                                                                             |                          |                           |                    |
| None characteristic included in the present study                                                                      |                          |                           |                    |
| <i>PET/CT</i>                                                                                                          |                          |                           |                    |
| SUV <sub>max</sub>                                                                                                     | 12.7 (4.0-35.0)          | 17.3 (7.4-37.2)           | <b>0.003</b>       |
| SUV <sub>mean</sub>                                                                                                    | 7.6 (2.8-23.2)           | 10.2 (4.3-23.7)           | <b>0.001</b>       |
| <b>"Early" examination</b>                                                                                             |                          |                           |                    |
| <i>US (n=74)</i>                                                                                                       |                          |                           |                    |
| Maximum tumor diameter, mm                                                                                             | 45.0 (19.0-75.0)         | 36.0 (13.0-61.0)          | <b>0.006</b>       |
| Tumor volume, cm <sup>3</sup>                                                                                          | 26.5 (2.0-107.9)         | 14.3 (1.1-81.8)           | <b>0.019</b>       |
| VI (n=74)                                                                                                              |                          |                           | <b>0.024</b>       |
| <i>MRI</i>                                                                                                             |                          |                           |                    |
| Maximum tumor diameter, mm                                                                                             | 13.4 (0.3-101.3)         | 5.6 (0.1-57.2)            | <b>0.003</b>       |
| Tumor volume, cm <sup>3</sup>                                                                                          | 35.0 (10.0-70.0)         | 28.5 (10.0-62.0)          | <b>0.001</b>       |
| <i>PET/CT</i>                                                                                                          |                          |                           |                    |
| MTV                                                                                                                    | 89.9 (4.5-779.4)         | 32.2 (4.2-1206.4)         | <b>0.004</b>       |
| TLG                                                                                                                    | 17.7 (1.3-106.5)         | 8.5 (1.6-94.6)            | <b>0.003</b>       |
| <b>"Final" examination</b>                                                                                             |                          |                           |                    |
| <i>US</i>                                                                                                              |                          |                           |                    |
| None characteristic included in the present study                                                                      |                          |                           |                    |
| <i>MRI (n=82)</i>                                                                                                      |                          |                           |                    |
| Maximum tumor diameter, mm                                                                                             | 0.5 (0-23.6)             | 0.1 (0-2.4)               | <b>&lt;0.0001</b>  |
| Tumor volume, cm <sup>3</sup>                                                                                          | 12 (0-58)                | 8.5 (0-20)                | <b>0.001</b>       |
| Evaluation according to high DWI SI plus ADC <sub>mean</sub> ≤ 1.1 × 10 <sup>-3</sup> mm <sup>2</sup> /s (n=82), n (%) | 28/44 (63.6)             | 7/38 (18.4)               | <b>&lt; 0.0001</b> |
| <i>PET/CT</i>                                                                                                          |                          |                           |                    |
| SUV <sub>max</sub>                                                                                                     | 2.7 (1.2-10.5)           | 2.3 (1.3-4.4)             | <b>0.001</b>       |
| SUV <sub>mean</sub>                                                                                                    | 2.1 (1.1-5.7)            | 1.8 (1.1-2.7)             | <b>0.004</b>       |
| TLG                                                                                                                    | 4.8 (0.7-138)            | 3.2 (0.1-25.7)            | <b>0.020</b>       |
| <b><math>\Delta</math> "baseline"- "early" examination</b>                                                             |                          |                           |                    |
| <i>US</i>                                                                                                              |                          |                           |                    |
| $\Delta$ Maximum tumor diameter %                                                                                      | 8.7 (-41.7-50.0)         | 20.8 (-13.2 -71.1)        | <b>0.012</b>       |
| $\Delta$ Tumor volume %                                                                                                | 16.4 (-231.0-90.0)       | 55.2 (-37.5-95.2)         | <b>0.017</b>       |
| $\Delta$ Tumor peak enhancement %                                                                                      | -56.5 (-2927.4-62.0)     | -1 (-676.1-77.1)          | <b>0.031</b>       |
| $\Delta$ Wash in rate %                                                                                                | -68.9 (-1588.8-95.3)     | 1.6 (-1101.2-89.4)        | <b>0.015</b>       |
| <i>MRI</i>                                                                                                             |                          |                           |                    |
| $\Delta$ Maximum tumor diameter %                                                                                      |                          |                           |                    |
| $\Delta$ Tumor volume %                                                                                                |                          |                           |                    |
| <i>PET/CT</i>                                                                                                          |                          |                           |                    |
| $\Delta$ SUV <sub>max</sub> %                                                                                          | 36.3 (-11.3-84)          | 52.1 (-9.1-84.9)          | <b>&lt; 0.0001</b> |
| $\Delta$ SUV <sub>mean</sub> %                                                                                         | 33 (-21.6-81.9)          | 52.3 (-8.7-86.5)          | <b>&lt; 0.0001</b> |
| $\Delta$ MTV %                                                                                                         | 37.8 (-254.2-93.8)       | 70 (-140.1-97.2)          | <b>0.001</b>       |

|                                          |                   |                     |                    |
|------------------------------------------|-------------------|---------------------|--------------------|
| Δ TLG %                                  | 59.8 (-141-96.6)  | 84.3 (-80.7-99.4)   | <b>0.0001</b>      |
| <b>Δ "baseline"- "final" examination</b> |                   |                     |                    |
| <i>US</i>                                |                   |                     |                    |
| Evaluation not performed                 |                   |                     |                    |
| <i>MRI</i>                               |                   |                     |                    |
| Δ Maximum tumor diameter %               | 98.3 (19.5-100.0) | 99.6 (94.3-100.0)   | <b>0.001</b>       |
| Δ Tumor volume %                         | 72.1 (10.8-100.0) | 80.5 (56.5-100.0)   | <b>0.001</b>       |
| Δ ADC <sub>mean</sub> % (n=82)           | -15.3 (-64.7-10)  | -33.3 (-157.1-14.3) | <b>0.007</b>       |
| <i>PET/CT</i>                            |                   |                     |                    |
| Δ SUV <sub>max</sub> %                   | 77.4 (26.3-91.8)  | 87 (67-93.1)        | <b>&lt; 0.0001</b> |
| Δ SUV <sub>mean</sub> %                  | 73.7 (12.7-91.5)  | 83.1 (63.6-91.8)    | <b>&lt; 0.0001</b> |
| Δ TLG %                                  | 97.6 (12.8-99.8)  | 98.8 (66.3-100)     | <b>0.003</b>       |

---

Results are presented as median (min-max), except where indicated. P value was calculated with two sided Mann-Whitney U test or Pearson's Chi Square test as appropriate. Bold font highlights statistically significant value. US: Ultrasound. MRI: Magnetic Resonance imaging. PET/CT: Positron Emission Tomography/Computer Tomography. VI: Vascularization Index. VFI: Vascularization Flow Index. SUV: Standardized Uptake Value. MTV: Metabolic Tumor Volume. TLG: Total Lesion Glycolysis. DWI SI: Diffusion Weighted Imaging Signal Intensity. ADC: Apparent Diffusion Coefficient.
